# Supplementary material for: Mechanistic study of 1,1-dimethylhydrazine transformation over Pt/SiO2 catalyst
Source: Royal Society of Chemistry journal article supplement (doi:10.1039/c8ra07769j), 2018-01-01
Supplement: c8ra07769j1.pdf [file c8ra07769j1.pdf]

***Supporting information for***

**Mechanistic study of 1,1-dimethylhydrazine transformation over Pt/SiO<sub>2</sub> catalyst**

**Andrei V. Smirnov<sup>\*</sup>, Pavel A. Kots, Maksim A. Panteleyev, Irina I. Ivanova**

*Department of Chemistry, Lomonosov Moscow State University, Leninskye Gory 1, bld. 3, 11999,  
Moscow, Russia.*

\*Corresponding author: Tel.: +7(495)939-3570; E mail address: avsmirnov@phys.chem.msu.ru.

Table S1 Characteristic ions in the mass spectra of UDMH and major products of its transformation

| Compound                                | Ions (m/z)                                                            |
|-----------------------------------------|-----------------------------------------------------------------------|
| $(\text{CH}_3)_2\text{N-NH}_2$ (UDMH)   | <b>60</b> , 42, <b>45</b> , 59, 18, 28, 30, 15, <b>43</b> , <b>44</b> |
| $\text{O}_2$                            | <b>32</b> , <b>16</b>                                                 |
| $\text{H}_2$                            | <b>2</b>                                                              |
| $\text{N}_2$                            | <b>28</b> , 14                                                        |
| $\text{CH}_4$                           | <b>16</b> , 15, 14, 13                                                |
| $\text{NH}_3$                           | <b>17</b> , <b>16</b>                                                 |
| $(\text{CH}_3)_2\text{N=N}$ (DMDA)      | 15, <b>43</b> , <b>28</b> , <b>58</b> , 27, 42                        |
| $(\text{CH}_3)_2\text{NH}$ (DMA)        | <b>44</b> , <b>45</b> , <b>28</b> , 42, 43                            |
| $(\text{CH}_3)_2\text{N-N=CH}_2$ (DMMH) | <b>72</b> , 42, 71, 30, 57, 43                                        |
| $\text{CH}_3\text{OH}$                  | <b>31</b> , <b>32</b> , <b>29</b> , 15                                |
| $\text{CH}_2\text{O}$                   | <b>29</b> , <b>30</b> , <b>28</b>                                     |
| $\text{NO}_x$                           | <b>30</b> , <b>44</b> , <b>28</b> , 46 <b>16</b> , 14,                |
| $\text{CO}_2$                           | <b>44</b> , 28                                                        |
| $\text{H}_2\text{O}$                    | <b>18</b> , <b>17</b>                                                 |
| $\text{HCN}$                            | <b>27</b> , <b>26</b>                                                 |

The ions used for identifying the corresponding compounds are marked bold.

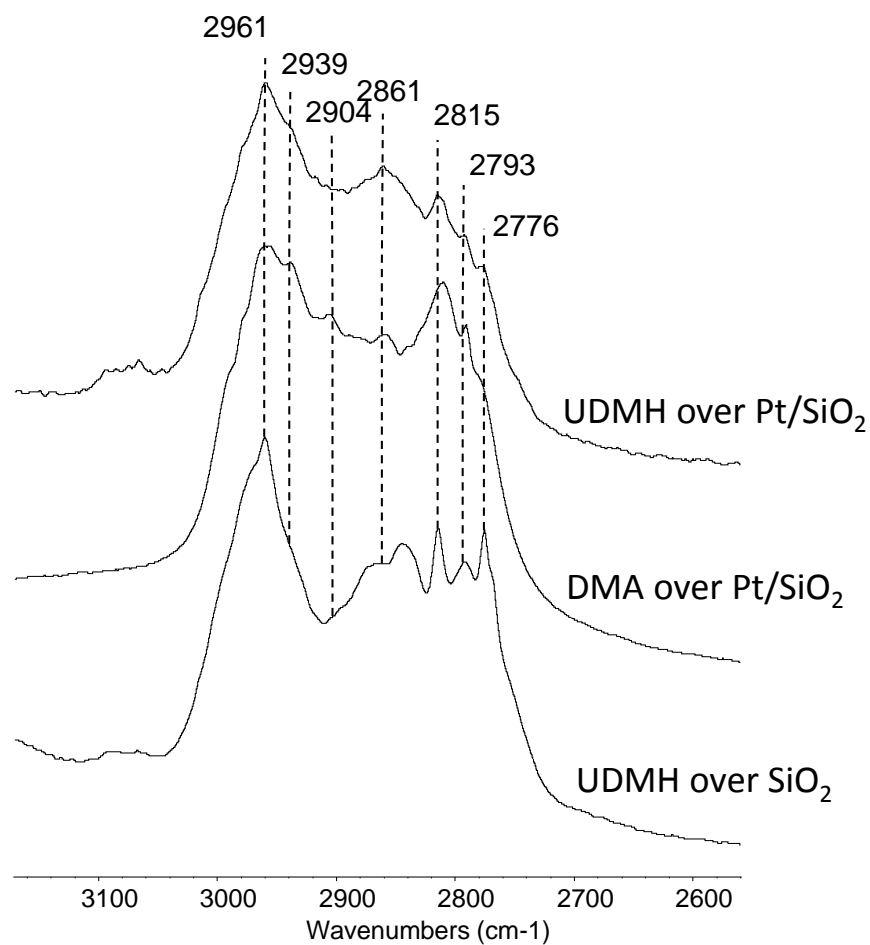

Fig. S1. *In situ* FTIR spectra obtained after UDMH pulse over Pt/SiO<sub>2</sub> and pure SiO<sub>2</sub> in 3%O<sub>2</sub>/He flow, and after DMA pulse over Pt/SiO<sub>2</sub> at 533 K.

Shoulder at 2939 cm<sup>-1</sup> corresponds to product of UDMH conversion – DMA, as verified by separate experiment. So, various species may contribute to observed picture in C-H stretching region of the spectra.

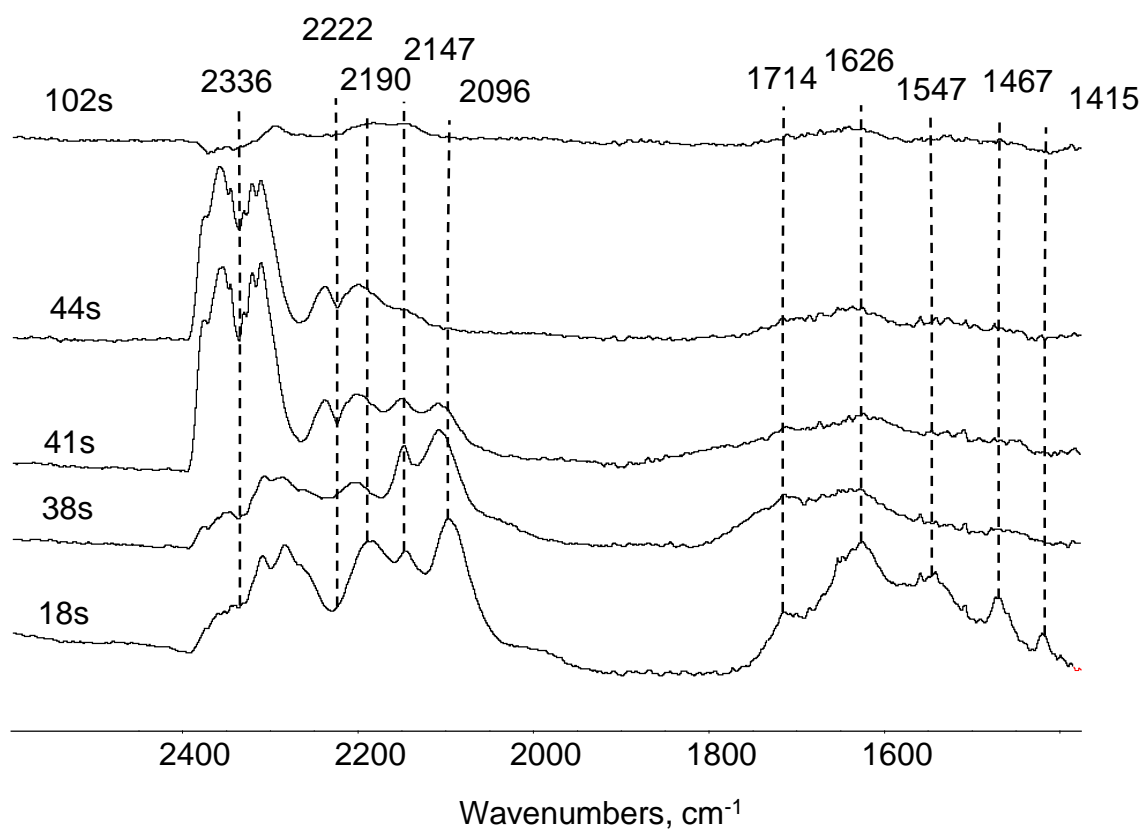

Fig. S2. *In situ* FTIR spectra of Pt/SiO<sub>2</sub> sample exposed to DMA pulse in 3%O<sub>2</sub>/He flow at 533 K.

Bands at 2190, 2147 and 2096 cm<sup>-1</sup> due to C≡N vibrations were found in spectra of DMA reaction over Pt/SiO<sub>2</sub>. This data clearly shows that DMA is an important intermediate in UDMH transformation to surface deposits.
